# Supplementary material for: Do Water and Nitrogen Management Practices Impact Grain Quality in Maize?
Source: MDPI journal article supplement (doi:10.3390/agronomy11091851), 2021-09-15
Supplement: s1 [file s1]

Supplementary material

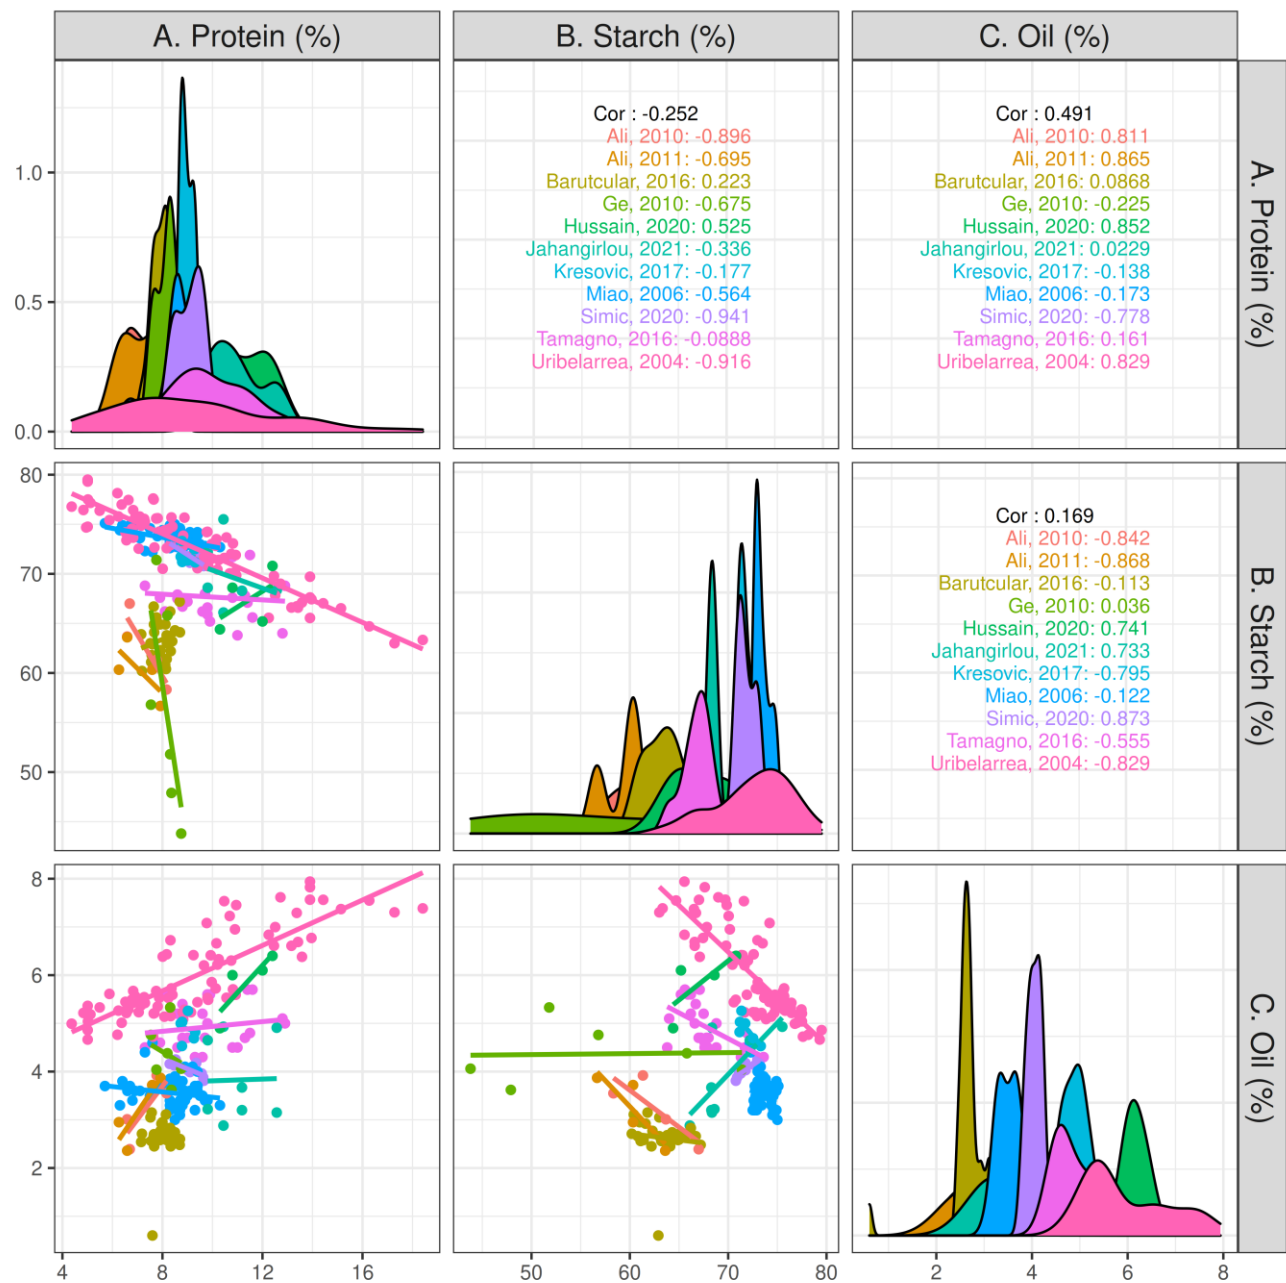

**Supplementary Figure S1.** Correlation matrix between protein concentration (%), starch concentration (%), and oil concentration (%) split by study quantifying the three variables (n = 239) (Table 1).

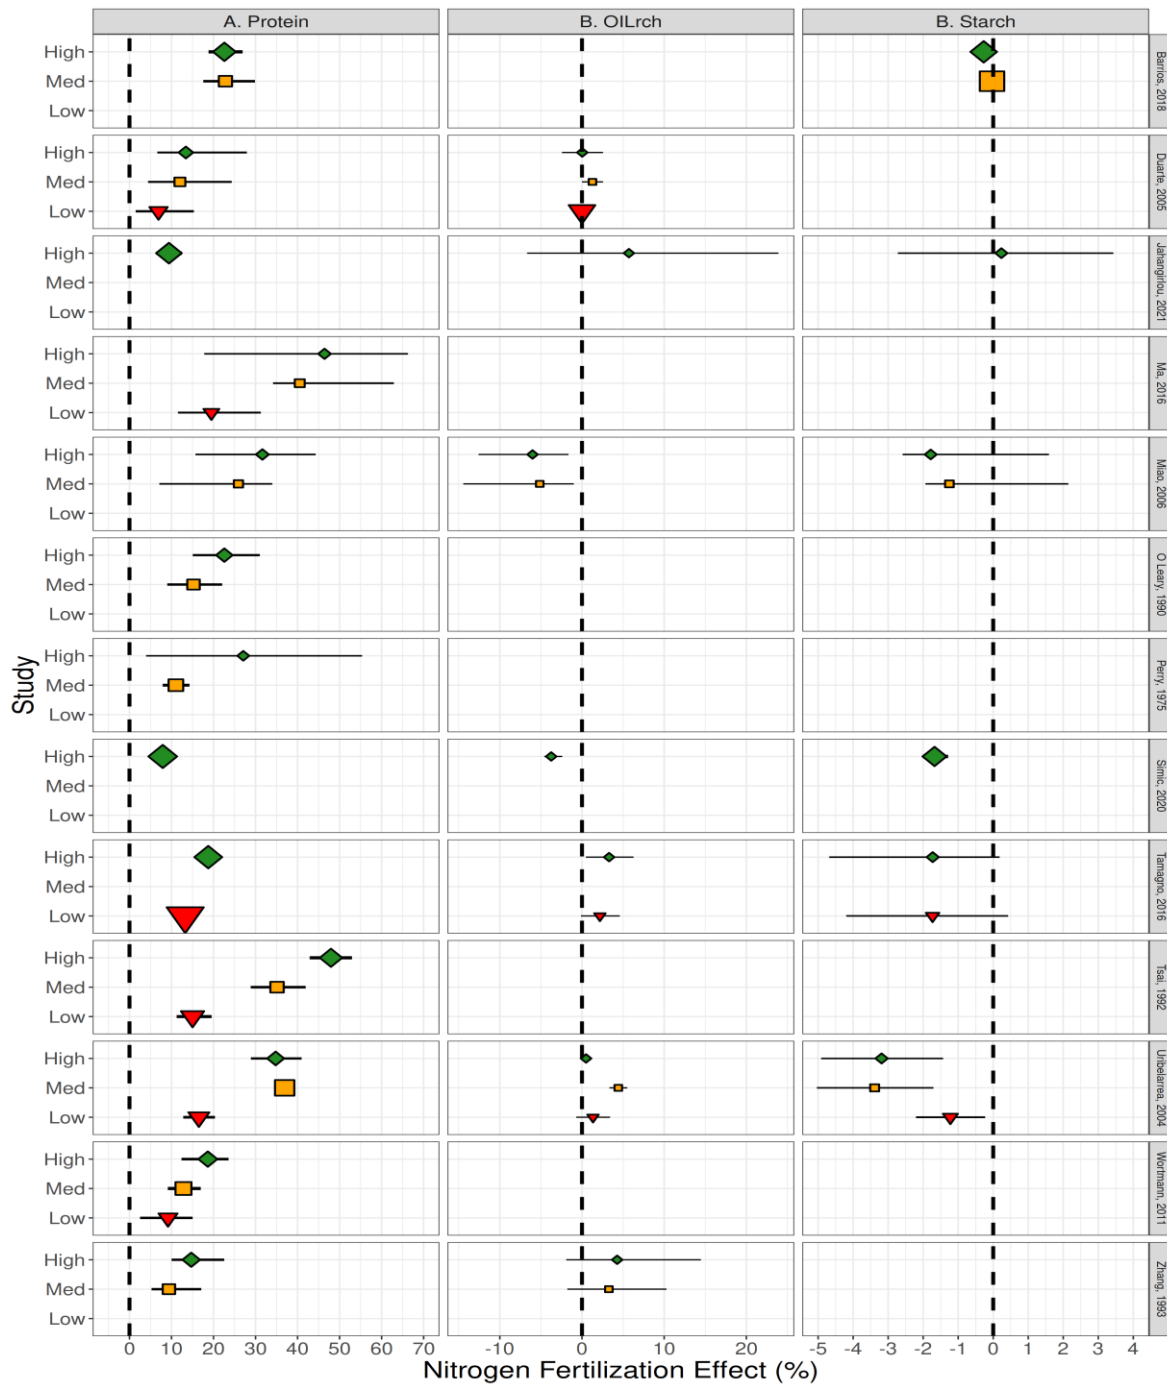

**Supplementary Figure S2.** By-study summary of effect sizes (%) of nitrogen fertilization on maize grain quality components (A – Protein, B – Starch, and C – Oil) considering the rate level (Low <70 kg N ha<sup>-1</sup>, Med 71-150 kg N ha<sup>-1</sup>, and High >150 kg N ha<sup>-1</sup>). Within each variable, symbols represent the mean effect, shape size represents the weight, and whiskers their respective 95% confidence intervals (CI, whiskers), which were transformed from lnRR into percentage ( $\exp(\ln RR) - 1 \times 100$ ), as the protein, starch or oil concentration variation in N fertilized compared to their respective control (0 kg N ha<sup>-1</sup>).
